# Supplementary material for: Wild Fragaria vesca L. fruits: a rich source of bioactive phytochemicals
Source: Royal Society of Chemistry journal article supplement (doi:10.1039/c6fo01042c), 2016-01-01
Supplement: c6fo01042c1.pdf [file c6fo01042c1.pdf]

**Supplemental material.** Antibiotic susceptibility profile of Gram negative and Gram positive bacteria.

|                               | Gram negative           |                                 |                                 |                              |                                    |                            |                               | Gram positive                  |       |                              |                                 |
|-------------------------------|-------------------------|---------------------------------|---------------------------------|------------------------------|------------------------------------|----------------------------|-------------------------------|--------------------------------|-------|------------------------------|---------------------------------|
|                               | <i>Escherichia coli</i> | <i>Escherichia coli</i> ESBL 1* | <i>Escherichia coli</i> ESBL 2* | <i>Klebsiella pneumoniae</i> | <i>Klebsiella pneumoniae</i> ESBL* | <i>Morganella morganii</i> | <i>Pseudomonas aeruginosa</i> | <i>Acinetobacter baumannii</i> | MRSA* | <i>Enterococcus faecalis</i> | <i>Streptococcus agalactiae</i> |
| Amikacin                      | na                      | S                               | R                               | na                           | S                                  | na                         | S                             | S                              | na    | na                           | na                              |
| Amoxicillin/Clavulanic acid   | S                       | R                               | R                               | S                            | R                                  | R                          | na                            | na                             | na    | na                           | na                              |
| Ampicilin                     | R                       | R                               | na                              | R                            | R                                  | R                          | na                            | na                             | na    | S                            | S                               |
| Cefotaxime                    | na                      | R                               | na                              | R                            | R                                  | na                         | na                            | R                              | na    | na                           | na                              |
| Ceftalorina                   | na                      | na                              | na                              | na                           | na                                 | na                         | na                            | na                             | na    | na                           | na                              |
| Ceftazidime                   | na                      | R                               | R                               | na                           | R                                  | R                          | R                             | R                              | na    | na                           | na                              |
| Cefuroxime                    | S                       | R                               | na                              | R                            | R                                  | na                         | na                            | na                             | na    | na                           | na                              |
| Ciprofloxacin                 | R                       | R                               | S                               | R                            | R                                  | R                          | R                             | na                             | na    | na                           | na                              |
| Clindamycin                   | na                      | na                              | na                              | na                           | na                                 | na                         | na                            | na                             | R     | na                           | S                               |
| Colistin                      | na                      | na                              | S                               | na                           | na                                 | na                         | S                             | na                             | na    | na                           | na                              |
| Erythromycin                  | na                      | na                              | na                              | na                           | na                                 | na                         | na                            | na                             | R     | na                           | S                               |
| Ertapenem                     | na                      | S                               | na                              | S                            | S                                  | S                          | na                            | na                             | na    | na                           | na                              |
| Fosfomicin                    | S                       | na                              | na                              | S                            | na                                 | na                         | na                            | na                             | R     | na                           | na                              |
| Gentamicin                    | R                       | S                               | s                               | S                            | R                                  | S                          | R                             | S                              | R     | na                           | na                              |
| Imipenem                      | na                      | na                              | S                               | na                           | na                                 | na                         | R                             | na                             | na    | na                           | na                              |
| Levofloxacin                  | na                      | R                               | na                              | na                           | R                                  | na                         | R                             | S                              | R     | na                           | na                              |
| Linezolid                     | na                      | na                              | na                              | na                           | na                                 | na                         | na                            | na                             | S     | na                           | na                              |
| Meropenem                     | na                      | S                               | S                               | na                           | S                                  | na                         | R                             | R                              | na    | na                           | na                              |
| Minocycline                   | na                      | na                              | R                               | na                           | na                                 | na                         | na                            | S                              | na    | na                           | na                              |
| Nitrofurantoin                | S                       | S                               | na                              | R                            | R                                  | R                          | na                            | na                             | S     | S                            | na                              |
| Norfloxacin                   | R                       | na                              | na                              | R                            | na                                 | na                         | na                            | na                             | na    | na                           | na                              |
| Oxacilin                      | na                      | na                              | na                              | na                           | na                                 | na                         | na                            | na                             | R     | na                           | na                              |
| Penicillin                    | na                      | na                              | na                              | na                           | na                                 | na                         | na                            | na                             | na    | na                           | na                              |
| Piperacillin/Tazobactam       | na                      | S                               | R                               | S                            | R                                  | R                          | R                             | R                              | na    | na                           | na                              |
| Tobramycin                    | na                      | S                               | R                               | na                           | R                                  | na                         | R                             | na                             | na    | na                           | na                              |
| Trimethoprim/sulfamethoxazole | R                       | R                               | S                               | R                            | R                                  | S                          | na                            | S                              | S     | na                           | na                              |
| Vancomycin                    | na                      | na                              | na                              | na                           | na                                 | na                         | na                            | na                             | S     | na                           | na                              |
